# Supplementary material for: Multicenter analysis of neutrophil extracellular trap dysregulation in adult and pediatric COVID-19
Source: PubMed Central journal article supplement (PMC9534551; doi:10.1172/jci.insight.160332), 2022-08-22
Supplement: jciinsight-7-160332-s015.pdf [file jciinsight-7-160332-s015.pdf]

**SUPPLEMENTARY TABLE 1: WHOLE GENOME SEQUENCING ANALYSIS OF NON DEGRADERS AND DEGRADERS IN PEDIATRIC SAMPLES**

**AUTOSOMAL DOMINANT**

| <i>family_id</i> | <i>Category</i>              | <i>gene</i> | <i>chrom</i> | <i>start</i> | <i>end</i> | <i>ref</i> | <i>alt</i> | <i>impact</i> | <i>impact_severity</i> | <i>rs_ids</i> | <i>gnomad_MAF</i> |
|------------------|------------------------------|-------------|--------------|--------------|------------|------------|------------|---------------|------------------------|---------------|-------------------|
| HGR0001431       | NONdegraders-MISC            | DNASE1      | chr16        | 3705871      | 3705872    | C          | CCCTGGTC   | frameshift    | HIGH                   | None          | 0                 |
| HGR0004923       | NONdegraders-MISC            | DNASE1L3    | chr3         | 58183635     | 58183636   | G          | A          | missense_     | MED                    | rs3567747     | 0.0500614         |
| HGR0004914       | NONdegraders-MISC            | DNASE1      | chr16        | 3707256      | 3707257    | C          | T          | missense_     | MED                    | rs1483739     | 0.00109926        |
| HGR0001435       | NONdegraders-MISC            | DNASE1      | chr16        | 3707256      | 3707257    | C          | T          | missense_     | MED                    | rs1483739     | 0.00109926        |
| HGR0004936       | NONdegraders-MISC            | DNASE2B     | chr1         | 84880426     | 84880427   | G          | A          | missense_     | MED                    | rs7604239     | 0.0315103         |
| HGR0001429       | Conflict degrader status - M | DNASE1      | chr16        | 3707916      | 3707917    | T          | C          | missense_     | MED                    | rs7585217     | None              |
| HGR0004931       | NONdegraders-MISC            | DNASE1      | chr16        | 3706648      | 3706649    | G          | A          | missense_     | MED                    | rs1430585     | 0.000194037       |
| HGR0004911       | NONdegraders-MISC            | TREX2       | chrX         | 1.53E+08     | 1.53E+08   | G          | A          | missense_     | MED                    | rs1412055     | 0.000233579       |
| HGR0004949       | NONdegraders-MISC            | DNASE1      | chr16        | 3707022      | 3707023    | C          | G          | missense_     | MED                    | rs1799891     | 0.00242734        |
| HGR0004921       | NONdegraders-MISC            | DNASE1      | chr16        | 3707022      | 3707023    | C          | G          | missense_     | MED                    | rs1799891     | 0.00242734        |
| HGR0004939       | NONdegraders-MISC            | DNASE1      | chr16        | 3707022      | 3707023    | C          | G          | missense_     | MED                    | rs1799891     | 0.00242734        |
| HGR0001430       | Conflict degrader status - M | DNASE1      | chr16        | 3705478      | 3705479    | G          | C          | missense_     | MED                    | rs3490739     | 0.0034904         |
| HGR0001428       | Degraders-MISC               | DNASE1L1    | chrX         | 1.54E+08     | 1.54E+08   | C          | T          | missense_     | MED                    | rs3495216     | 0.0331918         |
| HGR0004914       | NONdegraders-MISC            | DNASE1L2    | chr16        | 2287214      | 2287215    | G          | A          | splice_regi   | MED                    | rs160550      | 0.0886898         |
| HGR0004946       | NONdegraders-MISC            | DNASE1L2    | chr16        | 2287214      | 2287215    | G          | A          | splice_regi   | MED                    | rs160550      | 0.0886898         |
| HGR0004920       | NONdegraders-MISC            | DNASE1L2    | chr16        | 2287214      | 2287215    | G          | A          | splice_regi   | MED                    | rs160550      | 0.0886898         |
| HGR0004905       | NONdegraders-MISC            | DNASE1L3    | chr3         | 58191229     | 58191230   | G          | T          | missense_     | MED                    | rs1249194     | 0.00671661        |
| HGR0004932       | NONdegraders-MISC            | DNASE1L3    | chr3         | 58191229     | 58191230   | G          | T          | missense_     | MED                    | rs1249194     | 0.00671661        |
| HGR0004923       | NONdegraders-MISC            | DNASE1L3    | chr3         | 58191229     | 58191230   | G          | T          | missense_     | MED                    | rs1249194     | 0.00671661        |
| HGR0004931       | NONdegraders-MISC            | DNASE1L3    | chr3         | 58191229     | 58191230   | G          | T          | missense_     | MED                    | rs1249194     | 0.00671661        |
| HGR0004907       | NONdegraders-MISC            | SERPINB1    | chr6         | 2836485      | 2836486    | T          | TA         | splice_regi   | MED                    | rs1505646     | 0.0157305         |
| HGR0001429       | Conflict degrader status - M | DNASE1      | chr16        | 3707746      | 3707747    | G          | A          | missense_     | MED                    | rs1053874     | 0.444635          |
| HGR0001430       | Conflict degrader status - M | DNASE1      | chr16        | 3707746      | 3707747    | G          | A          | missense_     | MED                    | rs1053874     | 0.444635          |
| HGR0001428       | Degraders-MISC               | DNASE1      | chr16        | 3707746      | 3707747    | G          | A          | missense_     | MED                    | rs1053874     | 0.444635          |
| HGR0004926       | NONdegraders-MISC            | DNASE1      | chr16        | 3707746      | 3707747    | G          | A          | missense_     | MED                    | rs1053874     | 0.444635          |
| HGR0004927       | NONdegraders-MISC            | DNASE1      | chr16        | 3707746      | 3707747    | G          | A          | missense_     | MED                    | rs1053874     | 0.444635          |
| HGR0004912       | NONdegraders-MISC            | DNASE1      | chr16        | 3707746      | 3707747    | G          | A          | missense_     | MED                    | rs1053874     | 0.444635          |
| HGR0004949       | NONdegraders-MISC            | DNASE1      | chr16        | 3707746      | 3707747    | G          | A          | missense_     | MED                    | rs1053874     | 0.444635          |
| HGR0004914       | NONdegraders-MISC            | DNASE1      | chr16        | 3707746      | 3707747    | G          | A          | missense_     | MED                    | rs1053874     | 0.444635          |
| HGR0001422       | NONdegraders-MISC            | DNASE1      | chr16        | 3707746      | 3707747    | G          | A          | missense_     | MED                    | rs1053874     | 0.444635          |
| HGR0004907       | NONdegraders-MISC            | DNASE1      | chr16        | 3707746      | 3707747    | G          | A          | missense_     | MED                    | rs1053874     | 0.444635          |
| HGR0004911       | NONdegraders-MISC            | DNASE1      | chr16        | 3707746      | 3707747    | G          | A          | missense_     | MED                    | rs1053874     | 0.444635          |
| HGR0001437       | NONdegraders-MISC            | DNASE1      | chr16        | 3707746      | 3707747    | G          | A          | missense_     | MED                    | rs1053874     | 0.444635          |
| HGR0004933       | NONdegraders-MISC            | DNASE1      | chr16        | 3707746      | 3707747    | G          | A          | missense_     | MED                    | rs1053874     | 0.444635          |
| HGR0004909       | NONdegraders-MISC            | DNASE1      | chr16        | 3707746      | 3707747    | G          | A          | missense_     | MED                    | rs1053874     | 0.444635          |
| HGR0004920       | NONdegraders-MISC            | DNASE1      | chr16        | 3707746      | 3707747    | G          | A          | missense_     | MED                    | rs1053874     | 0.444635          |
| HGR0004946       | NONdegraders-MISC            | DNASE1      | chr16        | 3707746      | 3707747    | G          | A          | missense_     | MED                    | rs1053874     | 0.444635          |
| HGR0004930       | NONdegraders-MISC            | DNASE1      | chr16        | 3707746      | 3707747    | G          | A          | missense_     | MED                    | rs1053874     | 0.444635          |
| HGR0004921       | NONdegraders-MISC            | DNASE1      | chr16        | 3707746      | 3707747    | G          | A          | missense_     | MED                    | rs1053874     | 0.444635          |
| HGR0004939       | NONdegraders-MISC            | DNASE1      | chr16        | 3707746      | 3707747    | G          | A          | missense_     | MED                    | rs1053874     | 0.444635          |
| HGR0001424       | Degraders-MISC               | DNASE2B     | chr1         | 84864255     | 84864256   | G          | C          | missense_     | MED                    | rs3738573     | 0.321401          |
| HGR0001436       | Degraders-MISC               | DNASE2B     | chr1         | 84864255     | 84864256   | G          | C          | missense_     | MED                    | rs3738573     | 0.321401          |
| HGR0001434       | Degraders-MISC               | DNASE2B     | chr1         | 84864255     | 84864256   | G          | C          | missense_     | MED                    | rs3738573     | 0.321401          |
| HGR0001432       | Degraders-MISC               | DNASE2B     | chr1         | 84864255     | 84864256   | G          | C          | missense_     | MED                    | rs3738573     | 0.321401          |
| HGR0001433       | Degraders-MISC               | DNASE2B     | chr1         | 84864255     | 84864256   | G          | C          | missense_     | MED                    | rs3738573     | 0.321401          |
| HGR0004926       | NONdegraders-MISC            | DNASE2B     | chr1         | 84864255     | 84864256   | G          | C          | missense_     | MED                    | rs3738573     | 0.321401          |
| HGR0004905       | NONdegraders-MISC            | DNASE2B     | chr1         | 84864255     | 84864256   | G          | C          | missense_     | MED                    | rs3738573     | 0.321401          |
| HGR0004934       | NONdegraders-MISC            | DNASE2B     | chr1         | 84864255     | 84864256   | G          | C          | missense_     | MED                    | rs3738573     | 0.321401          |
| HGR0004932       | NONdegraders-MISC            | DNASE2B     | chr1         | 84864255     | 84864256   | G          | C          | missense_     | MED                    | rs3738573     | 0.321401          |
| HGR0004927       | NONdegraders-MISC            | DNASE2B     | chr1         | 84864255     | 84864256   | G          | C          | missense_     | MED                    | rs3738573     | 0.321401          |
| HGR0004917       | NONdegraders-MISC            | DNASE2B     | chr1         | 84864255     | 84864256   | G          | C          | missense_     | MED                    | rs3738573     | 0.321401          |
| HGR0004923       | NONdegraders-MISC            | DNASE2B     | chr1         | 84864255     | 84864256   | G          | C          | missense_     | MED                    | rs3738573     | 0.321401          |
| HGR0004912       | NONdegraders-MISC            | DNASE2B     | chr1         | 84864255     | 84864256   | G          | C          | missense_     | MED                    | rs3738573     | 0.321401          |
| HGR0004921       | NONdegraders-MISC            | DNASE2B     | chr1         | 84864255     | 84864256   | G          | C          | missense_     | MED                    | rs3738573     | 0.321401          |
| HGR0001435       | NONdegraders-MISC            | DNASE2B     | chr1         | 84864255     | 84864256   | G          | C          | missense_     | MED                    | rs3738573     | 0.321401          |
| HGR0004944       | NONdegraders-MISC            | DNASE2B     | chr1         | 84864255     | 84864256   | G          | C          | missense_     | MED                    | rs3738573     | 0.321401          |
| HGR0004942       | NONdegraders-MISC            | DNASE2B     | chr1         | 84864255     | 84864256   | G          | C          | missense_     | MED                    | rs3738573     | 0.321401          |
| HGR0004931       | NONdegraders-MISC            | DNASE2B     | chr1         | 84864255     | 84864256   | G          | C          | missense_     | MED                    | rs3738573     | 0.321401          |
| HGR0001427       | NONdegraders-MISC-repea      | DNASE2B     | chr1         | 84864255     | 84864256   | G          | C          | missense_     | MED                    | rs3738573     | 0.321401          |
| HGR0001429       | Conflict degrader status - M | DNASE2B     | chr1         | 84867609     | 84867610   | G          | A          | missense_     | MED                    | rs3754274     | 0.238885          |
| HGR0001434       | Degraders-MISC               | DNASE2B     | chr1         | 84867609     | 84867610   | G          | A          | missense_     | MED                    | rs3754274     | 0.238885          |
| HGR0001424       | Degraders-MISC               | DNASE2B     | chr1         | 84867609     | 84867610   | G          | A          | missense_     | MED                    | rs3754274     | 0.238885          |
| HGR0001432       | Degraders-MISC               | DNASE2B     | chr1         | 84867609     | 84867610   | G          | A          | missense_     | MED                    | rs3754274     | 0.238885          |
| HGR0001433       | Degraders-MISC               | DNASE2B     | chr1         | 84867609     | 84867610   | G          | A          | missense_     | MED                    | rs3754274     | 0.238885          |
| HGR0001436       | Degraders-MISC               | DNASE2B     | chr1         | 84867609     | 84867610   | G          | A          | missense_     | MED                    | rs3754274     | 0.238885          |
| HGR0004912       | NONdegraders-MISC            | DNASE2B     | chr1         | 84867609     | 84867610   | G          | A          | missense_     | MED                    | rs3754274     | 0.238885          |
| HGR0004934       | NONdegraders-MISC            | DNASE2B     | chr1         | 84867609     | 84867610   | G          | A          | missense_     | MED                    | rs3754274     | 0.238885          |
| HGR0004942       | NONdegraders-MISC            | DNASE2B     | chr1         | 84867609     | 84867610   | G          | A          | missense_     | MED                    | rs3754274     | 0.238885          |
| HGR0004923       | NONdegraders-MISC            | DNASE2B     | chr1         | 84867609     | 84867610   | G          | A          | missense_     | MED                    | rs3754274     | 0.238885          |
| HGR0004926       | NONdegraders-MISC            | DNASE2B     | chr1         | 84867609     | 84867610   | G          | A          | missense_     | MED                    | rs3754274     | 0.238885          |
| HGR0004917       | NONdegraders-MISC            | DNASE2B     | chr1         | 84867609     | 84867610   | G          | A          | missense_     | MED                    | rs3754274     | 0.238885          |
| HGR0004932       | NONdegraders-MISC            | DNASE2B     | chr1         | 84867609     | 84867610   | G          | A          | missense_     | MED                    | rs3754274     | 0.238885          |



|            |                         |         |      |          |          |   |   |              |           |          |
|------------|-------------------------|---------|------|----------|----------|---|---|--------------|-----------|----------|
| HGR0004931 | NONdegraders-MISC       | DNASE2B | chr1 | 84867609 | 84867610 | G | A | missense_MED | rs3754274 | 0.238885 |
| HGR0004932 | NONdegraders-MISC       | DNASE2B | chr1 | 84864255 | 84864256 | G | C | missense_MED | rs3738573 | 0.321401 |
| HGR0004932 | NONdegraders-MISC       | DNASE2B | chr1 | 84867609 | 84867610 | G | A | missense_MED | rs3754274 | 0.238885 |
| HGR0004934 | NONdegraders-MISC       | DNASE2B | chr1 | 84864255 | 84864256 | G | C | missense_MED | rs3738573 | 0.321401 |
| HGR0004934 | NONdegraders-MISC       | DNASE2B | chr1 | 84867609 | 84867610 | G | A | missense_MED | rs3754274 | 0.238885 |
| HGR0004942 | NONdegraders-MISC       | DNASE2B | chr1 | 84864255 | 84864256 | G | C | missense_MED | rs3738573 | 0.321401 |
| HGR0004942 | NONdegraders-MISC       | DNASE2B | chr1 | 84867609 | 84867610 | G | A | missense_MED | rs3754274 | 0.238885 |
| HGR0004944 | NONdegraders-MISC       | DNASE2B | chr1 | 84864255 | 84864256 | G | C | missense_MED | rs3738573 | 0.321401 |
| HGR0004944 | NONdegraders-MISC       | DNASE2B | chr1 | 84867609 | 84867610 | G | A | missense_MED | rs3754274 | 0.238885 |
| HGR0001427 | NONdegraders-MISC-repea | DNASE2B | chr1 | 84864255 | 84864256 | G | C | missense_MED | rs3738573 | 0.321401 |
| HGR0001427 | NONdegraders-MISC-repea | DNASE2B | chr1 | 84867609 | 84867610 | G | A | missense_MED | rs3754274 | 0.238885 |

**SUPPLEMENTARY TABLE 2: CORRELATIONS BETWEEN ELASTASE: DNA COMPLEXES AND CLINICAL VARIABLES IN SERUM SAMPLES**

| <b>FEATURE</b>                 | <b>VARIABLE (N);<br/>MEDIAN</b> | <b>VARIABLE (N);<br/>MEDIAN</b> | <b>P Value</b> |
|--------------------------------|---------------------------------|---------------------------------|----------------|
| Sex                            | F (71); 1.750                   | M (176); 1.435                  | 0.04329        |
| Age                            | <60 (120); 1.669                | >60 (127); 1.421                | 0.05880        |
| Severity                       | Mild (20); 6.740                | Moderate (18);<br>1.392         | 0.00086        |
| Severity                       | Mild (20); 6.740                | Severe (41); 1.473              | 2.16E-07       |
| Severity                       | Mild (20);                      | Critical (156); 1.405           | 9.56E-09       |
| Oxygen needs                   | None (14); 1.737                | Low Flow (83); 1.341            | 0.27880        |
| Oxygen needs                   | None (14); 1.737                | High Flow (22);<br>1.720        | 0.85834        |
| Oxygen needs                   | None (14); 1.737                | Intubation (31);<br>1.489       | 0.71304        |
| Oxygen needs                   | None (14); 1.737                | Tracheostomy (27);<br>1.288     | 0.24261        |
| Pneumonia                      | Absent (30); 5.596              | Present (203); 1.406            | 4.82E-07       |
| Renal Insufficiency            | Absent (227); 1.495             | Present (6); 1.423              | 0.64097        |
| Death                          | Alive (200); 1.620              | Deceased (43);<br>1.202         | 0.04125        |
| Need for ICU                   | ICU (73); 1.404                 | non-ICU (174); 1.620            | 0.06302        |
| Comorbidities                  | Absent (183); 1.406             | Present (45); 1.746             | 0.02078        |
| CVD                            | Absent (178); 1.529             | Present (50); 1.278             | 0.11870        |
| Hypertension                   | Absent (137); 1.523             | Present (91); 1.357             | 0.52106        |
| Diabetes Mellitus              | Absent (185); 1.495             | Present (43); 1.480             | 0.93352        |
| CHF                            | Absent (209); 1.489             | Present (19); 1.480             | 0.96089        |
| CKD                            | Absent (186); 1.500             | Present (42); 1.415             | 0.43488        |
| Obesity                        | Absent (207); 1.489             | Present (21); 1.398             | 0.95432        |
| Hematologic Malignancy         | Absent (177); 1.518             | Present (51); 1.404             | 0.27880        |
| Solid Malignancy               | Absent (204); 1.500             | Present (24); 1.412             | 0.68980        |
| Neurologic/Psychiatric Disease | Absent (182); 1.488             | Present (46); 1.485             | 0.51216        |
| Autoimmunity                   | Absent (180); 1.460             | Present (48); 1.718             | 0.15354        |
| Chronic Respiratory Disease    | Absent (206); 1.492             | Present (22); 1.477             | 0.42819        |
| Liver Disease                  | Absent (210); 1.485             | Present (18); 1.611             | 0.99851        |
| Solid Organ Transplant         | Absent (211); 1.505             | Present (17); 1.357             | 0.71938        |

**SUPPLEMENTARY TABLE 3: CORRELATIONS BETWEEN CITRULLINATED HISTONE H3: DNA COMPLEXES AND CLINICAL VARIABLES IN PLASMA SAMPLES**

| <b>FEATURE</b>                 | <b>VARIABLE (N);<br/>MEDIAN</b> | <b>VARIABLE (N);<br/>MEDIAN</b> | <b>P Value</b> |
|--------------------------------|---------------------------------|---------------------------------|----------------|
| Sex                            | F (17); 2.008                   | M (73); 1.461                   | 0.70290        |
| Age                            | <60 (36); 1.343                 | >60 (54); 1.756                 | 0.55043        |
| Severity                       | Mild (2); 2.988                 | Moderate (3); 3.714             | 0.80000        |
| Severity                       | Mild (2); 2.988                 | Severe (14); 2.060              | 0.81667        |
| Severity                       | Mild (2); 2.988                 | Critical (65); 1.448            | 0.24581        |
| Oxygen needs                   | None (1); 4.215                 | Low Flow (22); 2.032            | 0.34783        |
| Oxygen needs                   | None (1); 4.215                 | High Flow (5); 3.254            | 0.66667        |
| Oxygen needs                   | None (1); 4.215                 | Intubation (14);<br>0.902       | 0.26667        |
| Oxygen needs                   | None (1); 4.215                 | Tracheostomy (21);<br>1.013     | 0.18182        |
| Pneumonia                      | Absent (7); 2.934               | Present (77); 1.461             | 0.04833        |
| Renal Insufficiency            | Absent (81); 1.569              | Present (3); 2.932              | 0.51518        |
| Death                          | Alive (74); 1.458               | Deceased (12);<br>1.783         | 0.67630        |
| Need for ICU                   | ICU (41); 1.013                 | non-ICU (48); 2.260             | 0.01554        |
| Comorbidities                  | Absent (77); 1.752              | Present (6); 0.738              | 0.00949        |
| CVD                            | Absent (56); 1.343              | Present (27); 2.067             | 0.03368        |
| Hypertension                   | Absent (44); 1.076              | Present (39); 2.016             | 0.13392        |
| Diabetes Mellitus              | Absent (62); 1.489              | Present (21); 1.752             | 0.97911        |
| CHF                            | Absent (73); 1.569              | Present (10); 2.016             | 0.47991        |
| CKD                            | Absent (62); 1.19               | Present (21); 2.481             | 0.04486        |
| Obesity                        | Absent (74); 1.646              | Present (9); 1.53               | 0.74175        |
| Hematologic Malignancy         | Absent (55); 1.752              | Present (28); 1.265             | 0.95008        |
| Solid Malignancy               | Absent (73); 1.569              | Present (10); 1.764             | 0.81745        |
| Neurologic/Psychiatric Disease | Absent (62); 1.549              | Present (21); 1.752             | 0.62620        |
| Autoimmunity                   | Absent (58); 1.424              | Present (25); 2.008             | 0.39607        |
| Chronic Respiratory Disease    | Absent (74); 1.646              | Present (9); 1.059              | 0.35237        |
| Liver Disease                  | Absent (75); 1.448              | Present (8); 3.320              | 0.01713        |
| Solid Organ Transplant         | Absent (73); 1.387              | Present (10); 3.151             | 0.00803        |

ICU: intensive care unit; CVD: cardiovascular disease; CHF: congestive heart failure; CKD: chronic kidney disease.

SUPPLEMENTARY TABLE 4: WHOLE GENOME SEQUENCING ANALYSIS OF NON DEGRADERS AND DEGRADERS IN ADULT SAMPLES

| AUTOSOMAL DOMINANT |                    |          |       |          |          |      |     |                 |          |             |             |
|--------------------|--------------------|----------|-------|----------|----------|------|-----|-----------------|----------|-------------|-------------|
| HGRepID            | Category           | gene     | chrom | start    | end      | ref  | alt | impact          | severity | rs_ids      | gnomad_MAF  |
| HGR0000051         | NONdegraders-adult | DNASE2B  | chr1  | 84876683 | 84876684 | T    | C   | splice_don      | HIGH     | None        | None        |
| HGR0000094         | Degraders-adult    | DNASE2B  | chr1  | 84876683 | 84876684 | T    | C   | splice_don      | HIGH     | None        | None        |
| HGR0000085         | NONdegraders-adult | DNASE1L3 | chr3  | 58196632 | 58196633 | T    | A   | start_lost      | HIGH     | rs142482733 | 3.23164E-05 |
| HGR0000108         | NONdegraders-adult | DNASE2   | chr19 | 12987121 | 12987123 | GA   | G   | frameshift_HIGH |          | None        | None        |
| HGR0001226         | Degraders-adult    | DNASE1L3 | chr3  | 58183635 | 58183636 | G    | A   | missense_v      | MED      | rs35677470  | 0.0500614   |
| HGR0000028         | NONdegraders-adult | DNASE1L3 | chr3  | 58183635 | 58183636 | G    | A   | missense_v      | MED      | rs35677470  | 0.0500614   |
| HGR0000096         | Degraders-adult    | DNASE1L3 | chr3  | 58183635 | 58183636 | G    | A   | missense_v      | MED      | rs35677470  | 0.0500614   |
| HGR0000058         | Degraders-adult    | DNASE1L3 | chr3  | 58183635 | 58183636 | G    | A   | missense_v      | MED      | rs35677470  | 0.0500614   |
| HGR0000038         | Degraders-adult    | DNASE1L3 | chr3  | 58183635 | 58183636 | G    | A   | missense_v      | MED      | rs35677470  | 0.0500614   |
| HGR0000097         | Degraders-adult    | TREX1    | chr3  | 48508343 | 48508344 | G    | A   | missense_v      | MED      | rs200773268 | 3.23144E-05 |
| HGR0000014         | Degraders-adult    | DNASE2B  | chr1  | 84876679 | 84876680 | T    | C   | missense_v      | MED      | rs149919241 | 0.00152056  |
| HGR0001236         | Degraders-adult    | DNASE2B  | chr1  | 84876679 | 84876680 | T    | C   | missense_v      | MED      | rs149919241 | 0.00152056  |
| HGR0000083         | NONdegraders-adult | DNASE1L2 | chr16 | 2287648  | 2287649  | A    | C   | missense_v      | MED      | rs62621282  | 0.00323939  |
| HGR0000082         | Degraders-adult    | DNASE1L2 | chr16 | 2287648  | 2287649  | A    | C   | missense_v      | MED      | rs62621282  | 0.00323939  |
| HGR0000037         | NONdegraders-adult | TREX2    | chrX  | 1.53E+08 | 1.53E+08 | A    | G   | missense_v      | MED      | None        | None        |
| HGR0000074         | NONdegraders-adult | TREX1    | chr3  | 48508747 | 48508748 | A    | G   | missense_v      | MED      | None        | None        |
| HGR0000094         | Degraders-adult    | DNASE1L2 | chr16 | 2287264  | 2287265  | C    | T   | missense_v      | MED      | rs200934792 | 0.00042153  |
| HGR0000104         | NONdegraders-adult | DNASE1   | chr16 | 3706667  | 3706668  | A    | C   | missense_v      | MED      | rs34923865  | 0.0110644   |
| HGR0000110         | Degraders-adult    | DNASE1   | chr16 | 3706667  | 3706668  | A    | C   | missense_v      | MED      | rs34923865  | 0.0110644   |
| HGR0000064         | Degraders-adult    | DNASE1   | chr16 | 3707760  | 3707761  | C    | T   | missense_v      | MED      | None        | None        |
| HGR0000105         | Degraders-adult    | DNASE1L2 | chr16 | 2287293  | 2287294  | C    | G   | missense_v      | MED      | rs772354278 | None        |
| HGR0000056         | Degraders-adult    | DNASE2   | chr19 | 12987165 | 12987166 | C    | T   | missense_v      | MED      | rs766377327 | 0.000129358 |
| HGR0000006         | NONdegraders-adult | DNASE1L3 | chr3  | 58196729 | 58196730 | C    | T   | splice_regio    | MED      | None        | None        |
| HGR0000095         | NONdegraders-adult | DNASE1   | chr16 | 3705478  | 3705479  | G    | C   | missense_v      | MED      | rs34907394  | 0.0034904   |
| HGR0000068         | NONdegraders-adult | DNASE1   | chr16 | 3705478  | 3705479  | G    | C   | missense_v      | MED      | rs34907394  | 0.0034904   |
| HGR0000057         | NONdegraders-adult | DNASE1   | chr16 | 3705478  | 3705479  | G    | C   | missense_v      | MED      | rs34907394  | 0.0034904   |
| HGR0000110         | Degraders-adult    | SERPINB1 | chr6  | 2842045  | 2842046  | C    | A   | splice_regio    | MED      | None        | None        |
| HGR0000081         | NONdegraders-adult | DNASE1L3 | chr3  | 58191273 | 58191274 | C    | G   | missense_v      | MED      | rs74350392  | 0.00900581  |
| HGR0000015         | NONdegraders-adult | DNASE1L3 | chr3  | 58191273 | 58191274 | C    | G   | missense_v      | MED      | rs74350392  | 0.00900581  |
| HGR0000040         | NONdegraders-adult | DNASE1L3 | chr3  | 58191273 | 58191274 | C    | G   | missense_v      | MED      | rs74350392  | 0.00900581  |
| HGR0000028         | NONdegraders-adult | DNASE1L3 | chr3  | 58191273 | 58191274 | C    | G   | missense_v      | MED      | rs74350392  | 0.00900581  |
| HGR0001240         | NONdegraders-adult | DNASE1L3 | chr3  | 58191273 | 58191274 | C    | G   | missense_v      | MED      | rs74350392  | 0.00900581  |
| HGR0000071         | NONdegraders-adult | TREX2    | chrX  | 1.53E+08 | 1.53E+08 | C    | T   | missense_v      | MED      | rs200659060 | 0.00216644  |
| HGR0001235         | Degraders-adult    | DNASE1   | chr16 | 3705379  | 3705380  | G    | T   | missense_v      | MED      | rs8176927   | 0.0340248   |
| HGR0000079         | NONdegraders-adult | DNASE1   | chr16 | 3705379  | 3705380  | G    | T   | missense_v      | MED      | rs8176927   | 0.0340248   |
| HGR0000104         | NONdegraders-adult | DNASE1L1 | chrX  | 1.54E+08 | 1.54E+08 | C    | T   | missense_v      | MED      | rs34952165  | 0.0331918   |
| HGR0000059         | Degraders-adult    | DNASE1L1 | chrX  | 1.54E+08 | 1.54E+08 | C    | T   | missense_v      | MED      | rs34952165  | 0.0331918   |
| HGR0000071         | NONdegraders-adult | DNASE1L1 | chrX  | 1.54E+08 | 1.54E+08 | C    | T   | missense_v      | MED      | rs34952165  | 0.0331918   |
| HGR0000104         | NONdegraders-adult | DNASE1L2 | chr16 | 2287214  | 2287215  | G    | A   | splice_regio    | MED      | rs160550    | 0.0886898   |
| HGR0000090         | NONdegraders-adult | DNASE2   | chr19 | 12991918 | 12991919 | G    | C   | missense_v      | MED      | rs112348773 | 0.00371615  |
| HGR0001229         | NONdegraders-adult | SERPINB1 | chr6  | 2834086  | 2834087  | T    | C   | missense_v      | MED      | rs759268606 | None        |
| HGR0000104         | NONdegraders-adult | DNASE1   | chr16 | 3706979  | 3706980  | C    | T   | missense_v      | MED      | rs149357200 | 0.000743903 |
| HGR0000022         | NONdegraders-adult | DNASE1L3 | chr3  | 58186751 | 58186752 | G    | A   | missense_v      | MED      | rs747122870 | None        |
| HGR0000055         | NONdegraders-adult | SERPINB1 | chr6  | 2838237  | 2838241  | TAAA | T   | splice_regio    | MED      | rs751822160 | 9.93772E-05 |
| HGR0001234         | Degraders-adult    | DNASE1   | chr16 | 3707746  | 3707747  | G    | A   | missense_v      | MED      | rs1053874   | 0.444635    |
| HGR0000097         | Degraders-adult    | DNASE1   | chr16 | 3707746  | 3707747  | G    | A   | missense_v      | MED      | rs1053874   | 0.444635    |
| HGR0000110         | Degraders-adult    | DNASE1   | chr16 | 3707746  | 3707747  | G    | A   | missense_v      | MED      | rs1053874   | 0.444635    |
| HGR0000032         | Degraders-adult    | DNASE1   | chr16 | 3707746  | 3707747  | G    | A   | missense_v      | MED      | rs1053874   | 0.444635    |
| HGR0000087         | Degraders-adult    | DNASE1   | chr16 | 3707746  | 3707747  | G    | A   | missense_v      | MED      | rs1053874   | 0.444635    |
| HGR0001235         | Degraders-adult    | DNASE1   | chr16 | 3707746  | 3707747  | G    | A   | missense_v      | MED      | rs1053874   | 0.444635    |
| HGR0001233         | Degraders-adult    | DNASE1   | chr16 | 3707746  | 3707747  | G    | A   | missense_v      | MED      | rs1053874   | 0.444635    |
| HGR0000107         | Degraders-adult    | DNASE1   | chr16 | 3707746  | 3707747  | G    | A   | missense_v      | MED      | rs1053874   | 0.444635    |
| HGR0001239         | Degraders-adult    | DNASE1   | chr16 | 3707746  | 3707747  | G    | A   | missense_v      | MED      | rs1053874   | 0.444635    |
| HGR0000062         | Degraders-adult    | DNASE1   | chr16 | 3707746  | 3707747  | G    | A   | missense_v      | MED      | rs1053874   | 0.444635    |
| HGR0001237         | Degraders-adult    | DNASE1   | chr16 | 3707746  | 3707747  | G    | A   | missense_v      | MED      | rs1053874   | 0.444635    |
| HGR0000011         | Degraders-adult    | DNASE1   | chr16 | 3707746  | 3707747  | G    | A   | missense_v      | MED      | rs1053874   | 0.444635    |
| HGR0001228         | Degraders-adult    | DNASE1   | chr16 | 3707746  | 3707747  | G    | A   | missense_v      | MED      | rs1053874   | 0.444635    |
| HGR0000059         | Degraders-adult    | DNASE1   | chr16 | 3707746  | 3707747  | G    | A   | missense_v      | MED      | rs1053874   | 0.444635    |
| HGR0000101         | Degraders-adult    | DNASE1   | chr16 | 3707746  | 3707747  | G    | A   | missense_v      | MED      | rs1053874   | 0.444635    |
| HGR0001241         | Degraders-adult    | DNASE1   | chr16 | 3707746  | 3707747  | G    | A   | missense_v      | MED      | rs1053874   | 0.444635    |
| HGR0000007         | Degraders-adult    | DNASE1   | chr16 | 3707746  | 3707747  | G    | A   | missense_v      | MED      | rs1053874   | 0.444635    |
| HGR0000026         | Degraders-adult    | DNASE1   | chr16 | 3707746  | 3707747  | G    | A   | missense_v      | MED      | rs1053874   | 0.444635    |
| HGR0000061         | Degraders-adult    | DNASE1   | chr16 | 3707746  | 3707747  | G    | A   | missense_v      | MED      | rs1053874   | 0.444635    |
| HGR0000038         | Degraders-adult    | DNASE1   | chr16 | 3707746  | 3707747  | G    | A   | missense_v      | MED      | rs1053874   | 0.444635    |
| HGR0001224         | Degraders-adult    | DNASE1   | chr16 | 3707746  | 3707747  | G    | A   | missense_v      | MED      | rs1053874   | 0.444635    |











Supplementary Table 5. Summary of detection of NET remnants and degradation per cohort studied

| Cohort               | NETs      | Degradation |
|----------------------|-----------|-------------|
| MIS-C (Italy)        | no change | Impaired    |
| MIS-C (Chile)        | elevated  | Impaired    |
| CLL ( Italy)         | elevated  | no change   |
| CLL ( USA)           | elevated  | Impaired    |
| Covid19 symptomatic  | elevated  | Impaired    |
| Covid19 asymptomatic | no change | no change   |
| Covid19 ( Omicron)   | no change |             |

Supplementary Table 6. Demographic characteristics of healthy controls and patients used for each Figure

Figure 1-3

| Pediatric control (n=19) |            | Italian MIS-C cohort (n=6) |            | Italian CLL cohort (n=17) |            | Chile MIS-C cohort (n=27) |            | USA CLL cohort (n=9) |            |
|--------------------------|------------|----------------------------|------------|---------------------------|------------|---------------------------|------------|----------------------|------------|
| Age: 4 (1.8-6)           |            | Age: 5.8 (0.3-12)          |            | Age: 13 (9-15)            |            | Age: 6 (3-11)             |            | Age: 17 (14-19.5)    |            |
| Feature                  | Number (%) | Feature                    | Number (%) | Feature                   | Number (%) | Feature                   | Number (%) | Feature              | Number (%) |
| Male                     | N/A        | Male                       | 3 (50)     | Male                      | 9 (52.9)   | Male                      | 16 (59)    | Male                 | 5 (55.5)   |

Figure 4-6

| Adult Control (n=13) |            | Adult cohorts (n=280) |            |
|----------------------|------------|-----------------------|------------|
| Age: 56 (35- 63.5)   |            | Age: 60 (19-92)       |            |
| Feature              | Number (%) | Feature               | Number (%) |
| Male                 | 5 (38)     | Male                  | 192 (68.6) |

Figure-8

| Control (n=14)     |            | Alpha (n=14)      |            | Omicron (n=21) |            |
|--------------------|------------|-------------------|------------|----------------|------------|
| Age: 54 (40.5- 57) |            | Age: 60.5 (48-69) |            | Age:73 (64-85) |            |
| Feature            | Number (%) | Feature           | Number (%) | Feature        | Number (%) |
| Male               | 2 (14)     | Male              | 12(86)     | Male           | 13 (62)    |

Supplementary Table 7. Patients that underwent WGS .

| rsID                    | Gnomad MAD | Conflict degrader status - MISC (n=7) | Degraders-MISC (n=17) | NONdegraders-MISC (n=48) | Degraders-adult (n=49) | NONdegraders-adult (n=81) |
|-------------------------|------------|---------------------------------------|-----------------------|--------------------------|------------------------|---------------------------|
| rs1053874               | 0.444635   | 0.428571                              | 0.176471              | 0.208333                 | 0.234694               | 0.129630                  |
| rs3738573               | 0.321401   | 0.142857                              | 0.352941              | 0.250000                 | 0.204082               | 0.364198                  |
| rs3754274               | 0.238885   | 0.357143                              | 0.294118              | 0.239583                 | 0.265306               | 0.246914                  |
| rs7511984               | 0.178255   | 0.142857                              | 0.264706              | 0.062500                 | 0.122449               | 0.160494                  |
| rs3772985               | 0.175386   | 0.071429                              | 0.205882              | 0.114583                 | 0.071429               | 0.074074                  |
| rs160550                | 0.088690   | 0.000000                              | 0.000000              | 0.031250                 | 0.000000               | 0.006173                  |
| rs35677470              | 0.050061   | 0.000000                              | 0.029412              | 0.020833                 | 0.040816               | 0.006173                  |
| rs8176927               | 0.034025   | 0.000000                              | 0.000000              | 0.010417                 | 0.010204               | 0.006173                  |
| rs34952165              | 0.033192   | 0.071429                              | 0.029412              | 0.010417                 | 0.030612               | 0.030864                  |
| rs76042396              | 0.031510   | 0.000000                              | 0.000000              | 0.010417                 | 0.000000               | 0.000000                  |
| rs150564609,rs397957651 | 0.015731   | 0.000000                              | 0.000000              | 0.010417                 | 0.000000               | 0.000000                  |
| rs34923865              | 0.011064   | 0.000000                              | 0.029412              | 0.000000                 | 0.010204               | 0.006173                  |
| rs74350392              | 0.009006   | 0.000000                              | 0.000000              | 0.000000                 | 0.000000               | 0.030864                  |
| rs12491947              | 0.006717   | 0.000000                              | 0.029412              | 0.052083                 | 0.000000               | 0.000000                  |
| rs191517595             | 0.005206   | 0.000000                              | 0.029412              | 0.000000                 | 0.000000               | 0.000000                  |
| rs112348773             | 0.003716   | 0.000000                              | 0.000000              | 0.000000                 | 0.000000               | 0.006173                  |
| rs34907394              | 0.003490   | 0.071429                              | 0.000000              | 0.000000                 | 0.000000               | 0.018519                  |
| rs62621282              | 0.003239   | 0.000000                              | 0.000000              | 0.000000                 | 0.010204               | 0.006173                  |
| rs1799891               | 0.002427   | 0.000000                              | 0.000000              | 0.041667                 | 0.000000               | 0.000000                  |
| rs200659060             | 0.002166   | 0.000000                              | 0.000000              | 0.000000                 | 0.010204               | 0.006173                  |
| rs149919241             | 0.001521   | 0.000000                              | 0.000000              | 0.000000                 | 0.020408               | 0.000000                  |
| rs148373909             | 0.001099   | 0.000000                              | 0.000000              | 0.020833                 | 0.000000               | 0.000000                  |
| rs149357200             | 0.000744   | 0.000000                              | 0.000000              | 0.000000                 | 0.000000               | 0.006173                  |

|             |          |          |          |          |          |          |
|-------------|----------|----------|----------|----------|----------|----------|
| rs200934792 | 0.000422 | 0.000000 | 0.000000 | 0.000000 | 0.010204 | 0.000000 |
| rs144754107 | 0.000234 | 0.000000 | 0.000000 | 0.010417 | 0.000000 | 0.000000 |
| rs141205509 | 0.000234 | 0.000000 | 0.000000 | 0.010417 | 0.000000 | 0.000000 |
| rs143058517 | 0.000194 | 0.000000 | 0.000000 | 0.010417 | 0.000000 | 0.000000 |
| rs766377327 | 0.000129 | 0.000000 | 0.000000 | 0.000000 | 0.010204 | 0.000000 |
| rs751822160 | 0.000099 | 0.000000 | 0.000000 | 0.000000 | 0.000000 | 0.006173 |
| rs142482733 | 0.000032 | 0.071429 | 0.000000 | 0.000000 | 0.000000 | 0.006173 |
| rs200773268 | 0.000032 | 0.000000 | 0.029412 | 0.000000 | 0.000000 | 0.000000 |
| rs758521781 | 0.000000 | 0.071429 | 0.000000 | 0.000000 | 0.000000 | 0.000000 |
| rs948201418 | 0.000000 | 0.071429 | 0.000000 | 0.000000 | 0.000000 | 0.000000 |
| rs772354278 | 0.000000 | 0.000000 | 0.000000 | 0.000000 | 0.010204 | 0.000000 |
| rs759268606 | 0.000000 | 0.000000 | 0.000000 | 0.000000 | 0.000000 | 0.006173 |
| rs747122870 | 0.000000 | 0.000000 | 0.000000 | 0.000000 | 0.000000 | 0.006173 |

Supplementary Table 8. Test of reproducibility of serum/plasma samples after freeze and thaw cycles or heating at 60C .

|               | cit-H3-DNA/ Ela-DNA |  |                  |           | cit-H3-DNA/ Ela-DNA |                                 |
|---------------|---------------------|--|------------------|-----------|---------------------|---------------------------------|
| <b>Plasma</b> | <b>first round</b>  |  | <b>2nd round</b> |           | <b>non heated</b>   | <b>heated at 60C for 30 min</b> |
| Sample-1      | 4.68                |  | 2.09             | sample-1  | 0.94                | 0.97                            |
| Sample-2      | 2.22                |  | 4.62             | sample-2  | 0.98                | 0.97                            |
| Sample-3      | 3.67                |  | 5.20             | sample-3  | 1.04                | 1.01                            |
| Sample-4      | 2.89                |  | 2.09             | sample-4  | 1.08                | 1.05                            |
| Sample-5      | 1.66                |  | 1.93             | sample-5  | 0.96                | 1.00                            |
| Sample-6      | 1.13                |  | 1.42             | sample-6  | 7.46                | 5.87                            |
| Sample-7      | 6.54                |  | 3.51             | sample-7  | 1.02                | 1.03                            |
| Sample-8      | 7.96                |  | 10.51            | sample-8  | 1.64                | 1.14                            |
| Sample-9      | 1.52                |  | 3.66             | sample-9  | 4.17                | 3.89                            |
| <b>Serum</b>  |                     |  |                  | sample-10 | 1.02                | 1.02                            |
| Sample-10     | 1.10                |  | 1.13             | sample-11 | 1.27                | 1.13                            |
| Sample-11     | 5.80                |  | 4.30             | sample-12 | 1.01                | 0.93                            |
| Sample-12     | 0.98                |  | 1.13             | sample-13 | 0.88                | 0.97                            |
| Sample-13     | 2.40                |  | 4.26             | sample-14 | 0.91                | 0.93                            |
| Sample-14     | 2.15                |  | 1.60             | sample-15 | 0.92                | 1.04                            |
| Sample-15     | 2.23                |  | 1.73             | sample-16 | 2.31                | 3.28                            |
| Sample-16     | 1.80                |  | 0.81             | sample-17 | 1.12                | 1.48                            |
| Sample-17     | 2.13                |  | 3.06             | sample-18 | 0.69                | 0.76                            |
| Sample-18     | 0.70                |  | 0.89             | sample-19 | 1.76                | 1.94                            |
| Sample-19     | 1.62                |  | 3.37             | sample-20 | 0.78                | 0.60                            |
| Sample-20     | 1.11                |  | 1.03             |           |                     |                                 |
| Sample-21     | 1.32                |  | 1.97             |           |                     |                                 |
| Sample-22     | 1.80                |  | 2.11             |           |                     |                                 |
| Sample-23     | 0.25                |  | 0.29             |           |                     |                                 |
| Sample-24     | 0.82                |  | 1.10             |           |                     |                                 |
| Sample-25     | 0.57                |  | 0.52             |           |                     |                                 |
| Sample-26     | 1.07                |  | 1.97             |           |                     |                                 |
| Sample-27     | 2.66                |  | 2.17             |           |                     |                                 |
